# Supplementary material
Source: publisher figshare collection journal article supplement (https://acs.figshare.com/ndownloader/files/22905173)
Supplement: Supplementary file 1 [file 22905173]

## Supporting Information

# Enhancing the Antibacterial Performance of Titanium Dioxide Nanofibers by Coating with Silver Nanoparticles

*Joshua Zheyang SOO<sup>a, d</sup>, Lay Ching CHAI<sup>b</sup>, Bee Chin ANG<sup>c, \*</sup>, Boon Hoong ONG<sup>a, \*</sup>*

<sup>a</sup> Nanotechnology & Catalysis Research Centre (NANOCAT), Institute for Advanced Studies, University of Malaya, 50603 Kuala Lumpur, Malaysia.

<sup>b</sup> Institute of Biological Studies, Faculty of Science, University of Malaya, 50603 Kuala Lumpur, Malaysia.

<sup>c</sup> Centre of Advanced Materials (CAM), Department of Chemical Engineering, Faculty of Engineering, University of Malaya, 50603 Kuala Lumpur, Malaysia.

<sup>d</sup> Department of Electronic Materials Engineering, Research School of Physics, The Australian National University, Canberra, ACT 2601, Australia.

\*E-mail: amelynang@um.edu.my

\*E-mail: bhong@um.edu.my

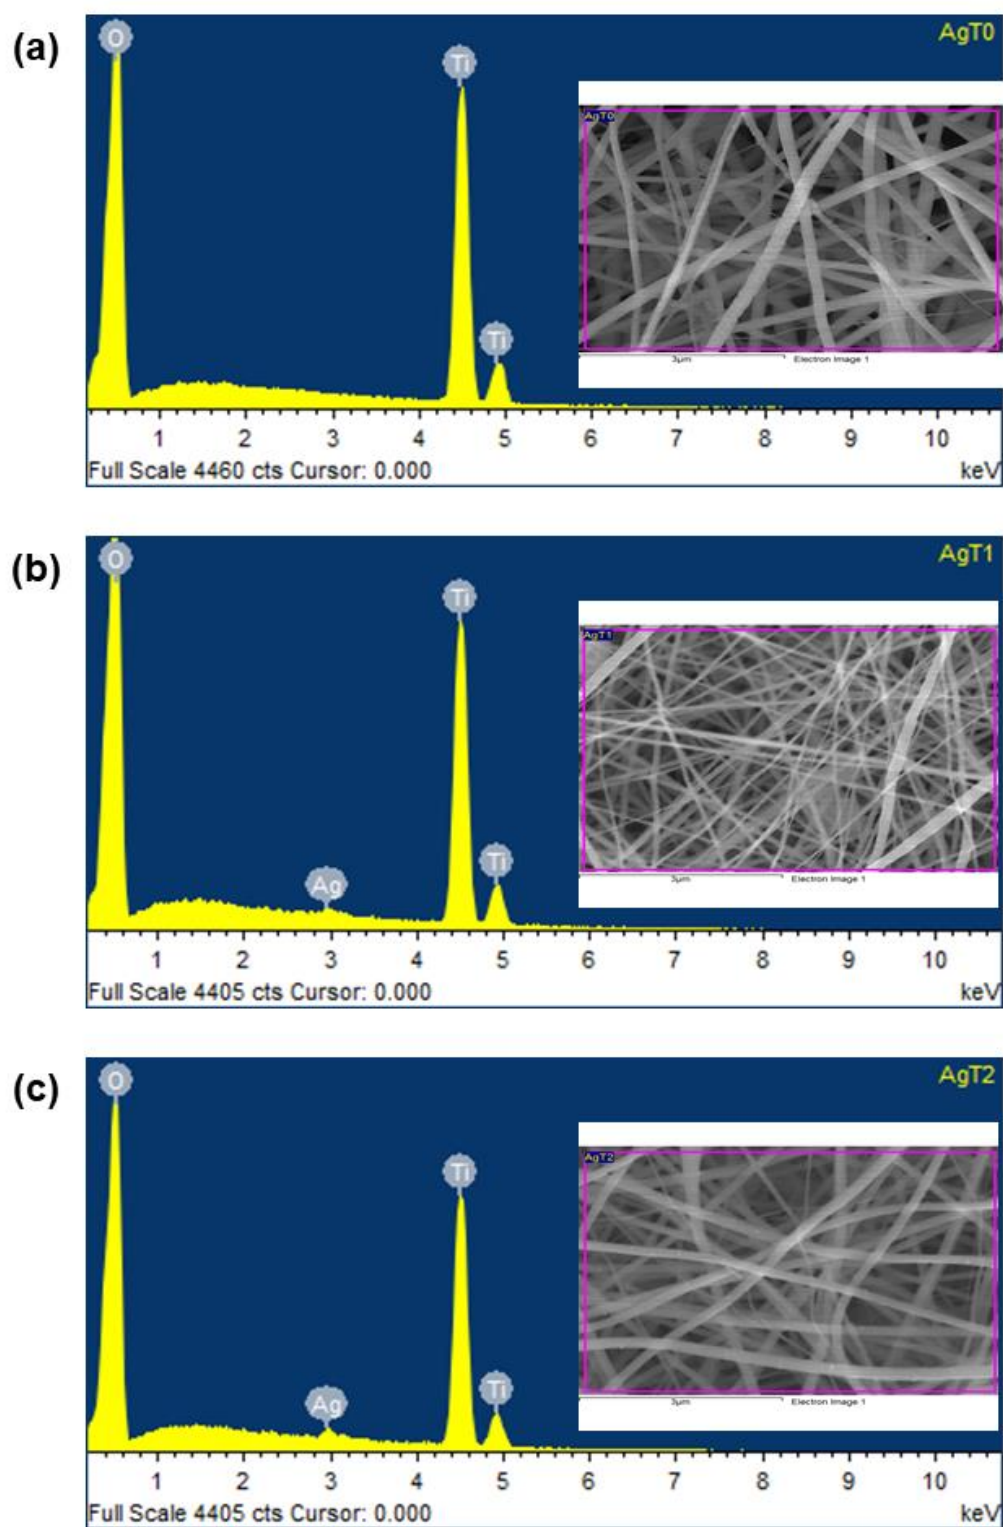

**Figure S1:** EDS spectra with analysed FESEM image (inset) for (a) AgT0, (b) AgT1 and (c) AgT2 samples.

**Table S1: Element Atomic Distribution for TiO<sub>2</sub> and AgTiO<sub>2</sub> Nanofiber Samples**

| <b>Element</b>     | <b>Atomic % (at.%)</b> |             |             |
|--------------------|------------------------|-------------|-------------|
|                    | <b>AgT0</b>            | <b>AgT1</b> | <b>AgT2</b> |
| <b>Ti K</b>        | 30.1                   | 27.4        | 27.5        |
| <b>O K</b>         | 69.9                   | 72.3        | 72.0        |
| <b>Ag L</b>        | 0.00                   | 0.3         | 0.5         |
| <b>Ag:Ti Ratio</b> | <b>0.00</b>            | <b>0.9</b>  | <b>1.8</b>  |

(a)

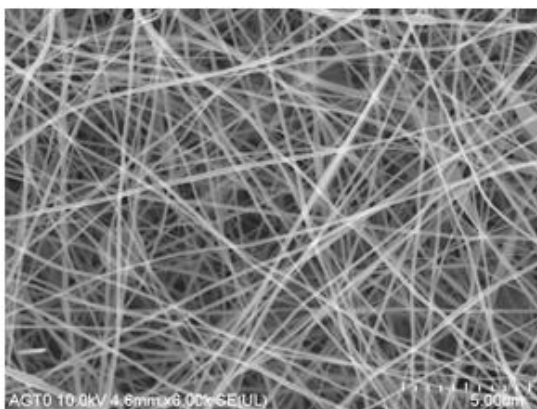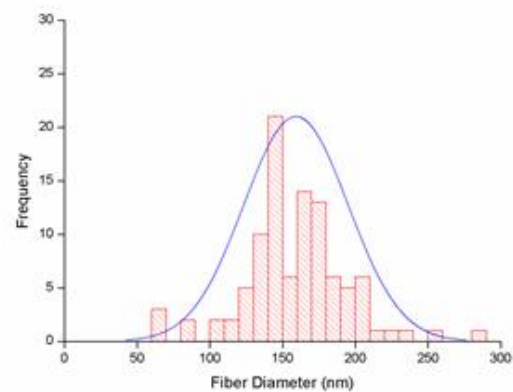

(b)

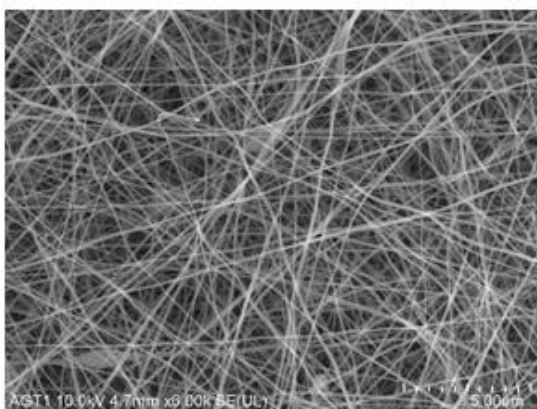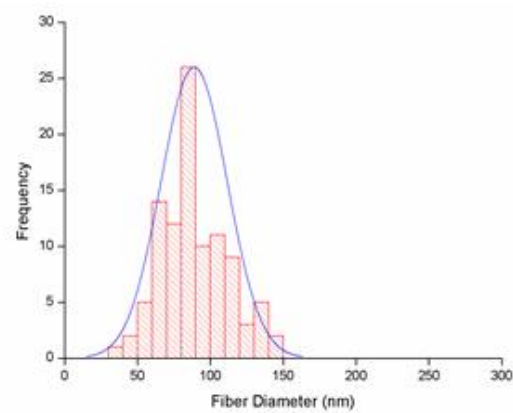

(c)

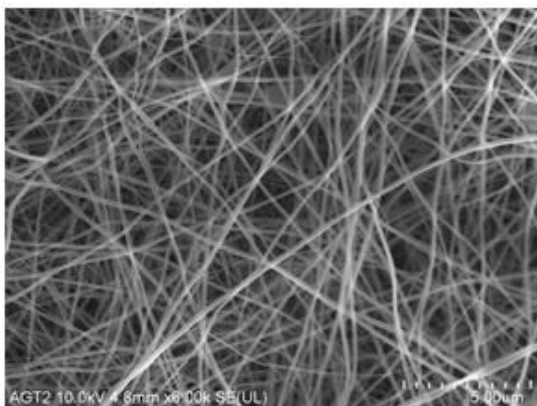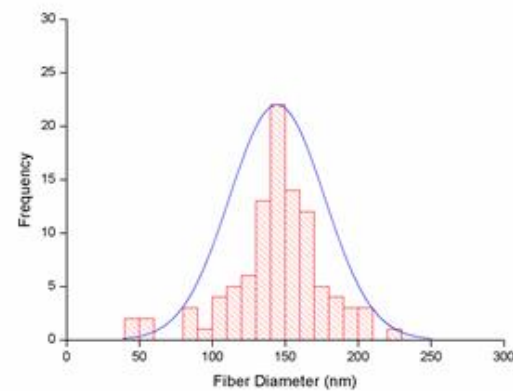

**Figure S2:** FESEM images with respective histograms of (a) AgT0, (b) AgT1 and (c) AgT2 samples.
